# Supplementary material for: Whole proteome analysis of post-translational modifications: Applications of mass-spectrometry for proteogenomic annotation
Source: HighWire-hosted journal article supplement (doi:10.1101/gr.6427907), 2007-08-09
Supplement: SupplementaryData_S5_ModificationExampleSpectra.zip [file precursorMass_modificationExamples.xls]

## Sheet: Sheet1
Spectrum	MH+	Charge(Z)	M/Z
C-116-SO_0325.dta	3974.99	3	1325.67
C-17-SO_1185.dta	1529.89	2	765.449
C-57-SO_0229.dta	1761.41	2	881.21
C-84-SO_0298.dta	2164.97	2	1082.99
C109-SO_0217.dta	1878.32	2	939.664
C119-SO_0241.dta	1312.56	2	656.785
C77-SO_0240.dta	2225.09	2	1113.05
D-18-SO_0780.dta	2708.68	2	1354.84
D46-SO_0226.dta	930.12	2	465.564
E-18-SO_1629.dta	1709.47	2	855.239
E14-SO_1278.dta	2554.3	3	852.106
E14-SO_3940.dta	1451.16	2	726.084
E40-SO_2644.dta	1682.77	2	841.889
E53-SO_3896.dta	2177.85	3	726.622
G14-SO_2880.dta	1791.13	2	896.069
H57-SO_0333.dta	1497.72	2	749.364
K14-SO_3237.dta	1922.78	2	961.894
K28-SO_0223.dta	1072.64	2	536.822
K43-SO_0217.dta	3184.6	2	1592.8
K57-SO_0704.dta	2160.83	2	1080.92
M-48-SO_2756.dta	829.89	2	415.449
M16-SO_0011.dta	1081.44	2	541.224
M32-SO_4747.dta	1523.16	2	762.084
M43-SO_0217.dta	1630.55	2	815.779
N-17-SO_0238.dta	1562.72	2	781.864
N1-SO_1202.dta	2123.76	2	1062.38
Nterminal100-SO_0220.dta	1648.72	2	824.864
Nterminal114-SO_0217.dta	1918.19	2	959.599
Nterminal28-SO_0254.dta	1276.72	2	638.864
Nterminal71-SO_1629.dta	1860.57	2	930.789
Nterminal84-SO_1632.dta	1307.76	2	654.384
P16-SO_0217.dta	2142.87	2	1071.94
Q-17-SO_0254.dta	1579.46	2	790.234
Q14-SO_0231.dta	1332.05	2	666.529
R-28-SO_1822.dta	2021.07	2	1011.04
R16-SO_0238.dta	1742.24	2	871.624
W16-SO_0217.dta	1272.69	2	636.849
W32-SO_0424.dta	1326.05	2	663.529
Y14-SO_3896.dta	2329.14	2	1165.08
